# Supplementary material
Source: publisher site journal article supplement (https://static.cambridge.org/content/id/urn:cambridge.org:id:article:S204017441900045X/resource/name/S204017441900045Xsupp003.pdf)

**Supplemental Figure S1: Demonstrating the direction of association between birth weight and CVD risk factors. The magnitude of association shown for statistically significant factors only (Figure not to scale)**

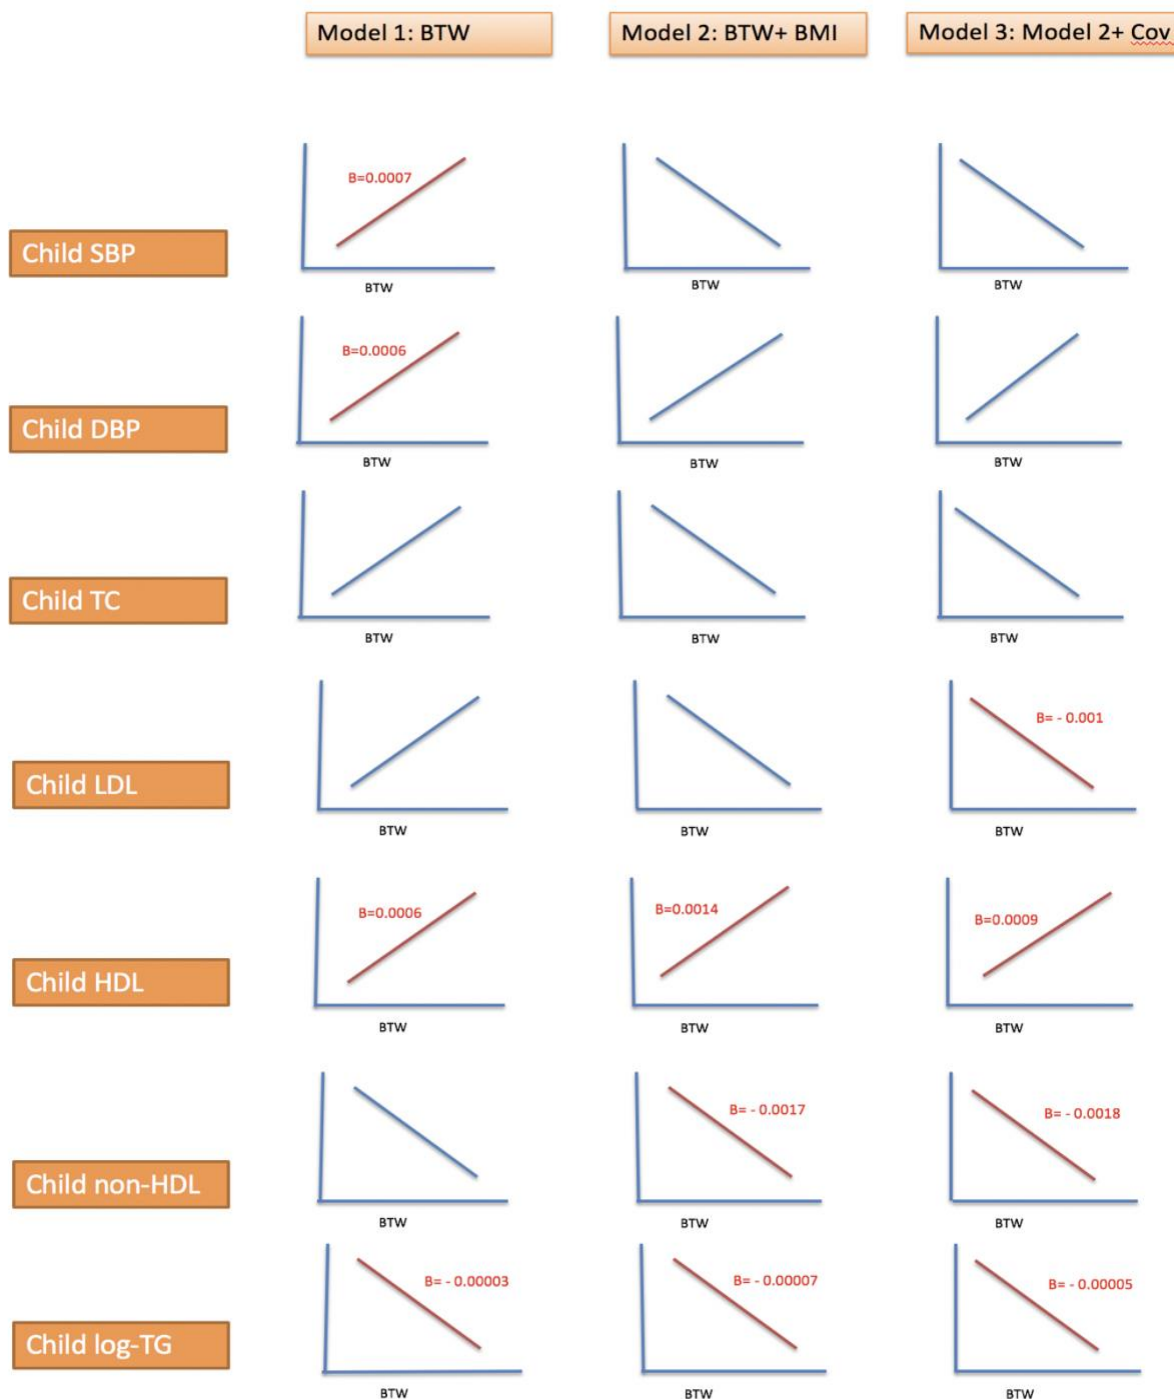

Supplement: Supplementary file 1 [file S204017441900045Xsupp003.pdf]
